# Supplementary material for: Rad50 ATPase activity is regulated by DNA ends and requires coordination of both active sites
Source: PubMed Central journal article supplement — Nucleic Acids Res. 2017 Mar 21;45(9):5255–68. doi: 10.1093/nar/gkx173 (PMC5435944; doi:10.1093/nar/gkx173), 2017-03-21
Supplement: gkx173_Supp.pdf [file gkx173_Supp.pdf]

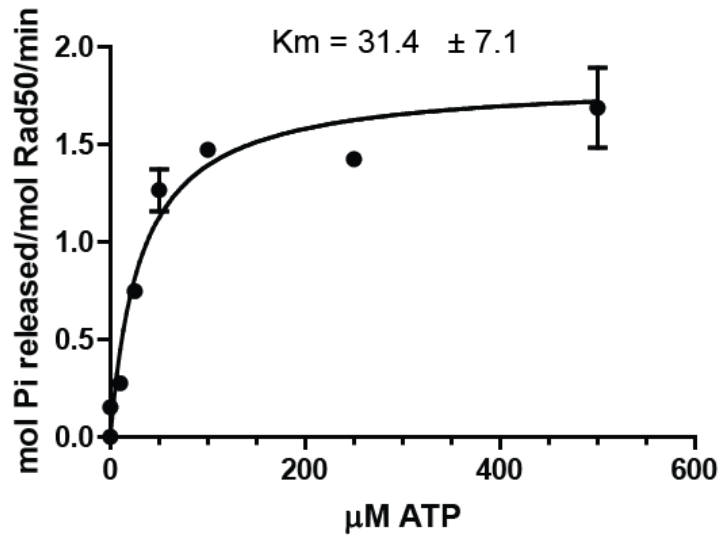

**Figure S1.** Human MR complex (50 nM) was assayed at 37°C for 1h with equimolar Nbs1 and 10, 25, 50, 100, 250 and 500 μM ATP and 1.2 nM 1 kb linear dsDNA. The ATPase activity was calculated as mol Pi released/mol Rad50/min and plotted against ATP concentration. The data from three replicates was fit with Michaelis-Menten equation in Graphpad Prism 5 software. Error bars represent standard deviation.
